1 **Oxidative stress resistance and fitness-compensatory response in vancomycin-**  
2 **intermediate *Staphylococcus aureus* (VISA)**

3

4 **Xin-Ee Tan<sup>1</sup>, Hui-min Neoh<sup>1,2#</sup>, Longzhu Cui<sup>3</sup>, Keiichi Hiramatsu<sup>2</sup> and Rahman Jamal<sup>1</sup>**

5

6 <sup>1</sup>UKM Medical Molecular Biology Institute (UMBI), Universiti Kebangsaan Malaysia,

7 Malaysia; <sup>2</sup>Department of Bacteriology, School of Medicine, Juntendo University, Japan;

8 <sup>3</sup>Division of Bacteriology, Department of Infection and Immunity, School of Medicine, Jichi

9 Medical University.

10

11

12 Running title: Oxidative stress response and fitness cost in VISA

13

14

15 # Corresponding author

16 Hui-min Neoh, Ph.D.,

17 UKM Medical Molecular Biology Institute (UMBI),

18 UKM Medical Centre,

19 Jalan Yaacob Latif,

20 56000 Cheras,

21 Kuala Lumpur, Malaysia.

22 Telephone: +60-3-9145- 9007

23 Fax: +60-3-9171-7185

24 Email: [hui-min@ppukm.ukm.edu.my](mailto:hui-min@ppukm.ukm.edu.my)

25

26 **Abstract**

27 In this study, VISA cells carrying *vraS* and/or *graR* mutations were shown to be more  
28 resistant to oxidative stress. *Caenorhabditis elegans* infected with these strains in turn  
29 demonstrated lower survival. Altered regulation in oxidative stress response and virulence  
30 appears to be physiological adaptations associated with VISA phenotype in the Mu50  
31 lineage.

32

33

34

35

36

37

38

39

40

41

42

43

44

45

46

47

48

49

50

51 Bacterial antibiotic resistance has been reported to occur concurrently with changes in  
52 various cellular responses of the organism. In particular, altered virulence mechanism is  
53 common among antibiotic resistant strains. Acquisition of antibiotic resistance often imposes  
54 a fitness burden on bacterial cells (1); in most cases, increased resistance has been paralleled  
55 with decreased virulence, as reported in methicillin-resistant *Staphylococcus aureus* (2, 3)  
56 and vancomycin-intermediate *S. aureus* (VISA) (4, 5). Apart from virulence, the association  
57 between antibiotic resistance and oxidative stress response has also been reported. Different  
58 classes of antibiotics, regardless of their primary targets, have been shown to induce lethality  
59 through generation of reactive oxygen species (ROS) (6, 7). In response, the bacteria will try  
60 to reduce antibiotic killing via reduction of cellular hydroxyl radical accumulation (8-12).

61

62 We previously employed a proteomic approach to determine underlying regulatory  
63 pathway(s) mediating transition of vancomycin-susceptible *S. aureus* (VSSA, strain Mu50Ω)  
64 to VISA (strain Mu50Ω-*vraSm*, harbouring a *vraS* T700A mutation; and strain Mu50Ω-  
65 *vraSm-graRm*, harbouring both *vraS* T700A/*graR* A590G mutations compared to strain  
66 Mu50Ω) (13). In the study, unexpected features of up-regulated oxidized protein repair  
67 enzyme (MsrB) and down-regulated virulence-associated proteins (Spa, Rot, MgrA, SarA) in  
68 VISAs were observed. Functional categorization and differential proteomic profiles of total  
69 proteins extracted from the 3 isogenic strains are presented in Figure 1 and Figure 2,  
70 respectively. Consistent up-regulation of MsrB as well as down-regulation of virulence-  
71 associated proteins in VISA strains lead us to suspect possible interplay between oxidative  
72 stress response, virulence and antibiotic resistance in VISA strains of the Mu50 lineage.

73

74 Methionine sulfoxide reductases (Msr) are bacterial repair enzymes important for  
75 protection from oxidative killing (14-17). To determine if different MsrB expression levels in

76 the 3 study strains affect their responses towards oxidative stress, Mu50Ω, Mu50Ω-*vraSm*  
77 and Mu50Ω-*vraSm-graRm* were treated with 3 oxidizing agents [cumene hydroperoxide,  
78 tert-butyl hydroperoxide and hydrogen peroxide (H<sub>2</sub>O<sub>2</sub>)] at various concentrations prior  
79 determination of viable cell counts. Interestingly, Mu50Ω-*vraSm* and Mu50Ω-*vraSm-graRm*  
80 were shown to have greater survival when challenged with cumene hydroperoxide (Figure 3)  
81 and tert-butyl hydroperoxide (Figure 4) compared to Mu50Ω, indicating that VISA strains  
82 (with up-regulated MsrB) exhibited higher resistance towards oxidative damage.

83

84 We postulate that in order to circumvent oxidative damage caused by vancomycin (6),  
85 VISA cells are primed to produce Msr proteins, which are the only known enzymes capable  
86 of reducing oxidized form of methionine, thereby restoring normal function of proteins (18).  
87 This cellular response is proposed to be mediated by *VraSR* system, since, in our previous  
88 study, up-regulation of MsrB proteins was identified in the *VraS* and *VraS-GraR* regulons,  
89 but not the *GraR* regulon (Figure 2). Accordingly, Pang et al.'s study demonstrated that  
90 complementation of *S. aureus vraSR* knockout mutant ( $\Delta$ *vraSR*) restored its *msrAI*  
91 expression to a higher level compared with  $\Delta$ *vraSR* (19).

92

93 Nevertheless, a different survival trend was observed in H<sub>2</sub>O<sub>2</sub>-induced VISA cells.  
94 Although having lower MsrB expression, VSSA Mu50Ω displayed greater survival after  
95 H<sub>2</sub>O<sub>2</sub> induction compared with VISA strains (Figure 5). Increased susceptibility to H<sub>2</sub>O<sub>2</sub>  
96 killing was previously reported to be associated with the lack of staphyloxanthin (carotenoid  
97 pigmentation) (20, 21). As suggested by Singh et al., *msrB* deletion reduced *S. aureus*  
98 susceptibility to H<sub>2</sub>O<sub>2</sub>, and this phenotype is accompanied by increased production of  
99 carotenoids in the mutant cells (22). In concordance, lower expression of MsrB in Mu50Ω

100 might have resulted in higher levels of cellular carotenoids and subsequent resistance to  
101 H<sub>2</sub>O<sub>2</sub>.

102

103 In addition to increased resistance to oxidative stress, down-regulation of virulence-  
104 related proteins is also observed in the Mu50Ω-*vraSm* and Mu50Ω-*vraSm-graRm* VISAs  
105 (Figure 2) (13). We subsequently used a *Caenorhabditis elegans* survival assay to determine  
106 our study strains' virulence (23). Forty L4 nematodes of *pos-1*-silenced *C. elegans* N2 strain  
107 were fed with the study strains of Mu50Ω, Mu50Ω-*vraSm* and Mu50Ω-*vraSm-graRm*,  
108 respectively; worm survival (quantity of live and dead worms) for every strain was then  
109 scored every 24 hours for 14 days and plotted on a Kaplan-Meier survival plot (Figure 6).  
110 The experiment showed that VISA strains exhibited higher nematocidal activity via complete  
111 killing of all 40 *C. elegans* on the 3<sup>rd</sup> (Mu50Ω-*vraSm-graRm*) and 8<sup>th</sup> (Mu50Ω-*vraSm*) day of  
112 the assay. On the other hand, killing of *C. elegans* fed with VSSA was gradual and surviving  
113 worms were still observed at the end of the 14-days assay.

114

115 *C. elegans* exhibits specific immune response towards different infective  
116 microorganisms; transcription profiles of *C. elegans* exposed to *Candida albicans* has been  
117 shown to be different from those infected with *Pseudomonas aeruginosa* or *S. aureus* (24).  
118 Both living and heat-killed *S. aureus* have been reported to be capable of triggering *C.*  
119 *elegans* responses (25). These studies suggest that *C. elegans* distinguish infections from  
120 different pathogens via recognition of specific bacterial pathogen-associated molecular  
121 patterns (PAMPs). Spa, a *S. aureus* cell wall surface protein, has been reported to be one of  
122 the PAMPs found in this Gram-positive bacterium (26). In our study, we postulate that down-  
123 regulation of Spa protein in VISA strains diminished the capability of *C. elegans* innate  
124 immune system to identify the bacteria, allowing VISA to achieve immune evasion.

125 Consequently, VISA infections of *C. elegans* were found to be more lethal compared with  
126 VSSA. Even though *C. elegans* produces ROS in response to *S. aureus* infection (27), as  
127 VISA strains in this study were found to be more resistant to oxidative killing due to higher  
128 expression of MsrB enzymes, the strains had a survival edge from the ROS attack of *C.*  
129 *elegans* compared to VSSA. This allows VISA strains to bypass *C. elegans* defence  
130 mechanisms, resulting in expedited killing of the hosts.

131

132 Taking into consideration the results from our previous (13, 28) and current studies,  
133 we propose the interplay between cellular metabolism, oxidative stress response and  
134 virulence in VISA strains of Mu50 lineage (Figure 7). The *vraS* and *graR* gene mutations in  
135 VISA strains activate arginine catabolism to supply substrates for cell wall biosynthesis (28),  
136 while oxidative stress response was triggered to neutralize oxidative damages induced by  
137 vancomycin. These metabolic alterations subsequently impose a fitness burden on VISA  
138 cells, causing a trade-off between bacterial resistance and virulence.

139

#### 140 **Acknowledgement**

141 The research was funded by the Ministry of Higher Education of Malaysia under the grant  
142 codes FRGS/1/2011/SKK/UKM/03/15 and FRGS/1/2014/SKK04/UKM/03/1. We thank Tee  
143 Ling Fei and Rosniza Mohamad Hussain for their guidance in handling and maintenance of  
144 *C. elegans*. The authors declare no conflict of interest.

145

#### 146 **References**

- 147 1. **Beceiro A, Tomás M, Bou G.** 2013. Antimicrobial resistance and virulence: a  
148 successful or deleterious association in the bacterial world? *Clin Microbiol Rev*  
149 **26**:185-230.

150

151 2. **Pozzi C, Waters EM, Rudkin JK, Schaeffer CR, Lohan AJ, Tong P, Loftus BJ,**  
152 **Pier GB, Fey PD, Massey RC, O'Gara JP.** 2012. Methicillin resistance alters the  
153 biofilm phenotype and attenuates virulence in *Staphylococcus aureus* device-  
154 associated infections. PLoS Pathog **8**:e1002626-e1002640.

155

156 3. **Rudkin JK, Edwards AM, Bowden MG, Brown EL, Pozzi C, Waters EM, Chan**  
157 **WC, Williams P, O'Gara JP, Massey RC.** 2012. Methicillin resistance reduces the  
158 virulence of healthcare-associated methicillin-resistant *Staphylococcus aureus* by  
159 interfering with the *agr* quorum sensing system. J Infect Dis **205**:798-806.

160

161 4. **Peleg AY, Monga D, Pillai S, Mylonakis E, Moellering RC, Jr., Eliopoulos GM.**  
162 2009. Reduced susceptibility to vancomycin influences pathogenicity in  
163 *Staphylococcus aureus* infection. J Infect Dis **199**:532-536.

164

165 5. **Majcherczyk PA, Barblan J-L, Moreillon P, Entenza JM.** 2008. Development of  
166 glycopeptide-intermediate resistance by *Staphylococcus aureus* leads to attenuated  
167 infectivity in a rat model of endocarditis. Microb Pathog **45**:408-414.

168

169 6. **Kohanski MA, Dwyer DJ, Hayete B, Lawrence CA, Collins JJ.** 2007. A common  
170 mechanism of cellular death induced by bactericidal antibiotics. Cell **130**:797-810.

171

172 7. **Brynildsen MP, Winkler JA, Spina CS, MacDonald IC, Collins JJ.** 2013.  
173 Potentiating antibacterial activity by predictably enhancing endogenous microbial  
174 ROS production. Nat Biotechnol **31**:160–165.

175

176 8. **Dwyer DJ, Belenky PA, Yang JH, MacDonald IC, Martell JD, Takahashi N,**  
177 **Chan CTY, Lobritz MA, Braff D, Schwarz EG, Ye JD, Pati M, Vercruyse M,**  
178 **Ralifo PS, Allison KR, Khalil AS, Ting AY, Walker GC, Collins JJ.** 2014.  
179 Antibiotics induce redox-related physiological alterations as part of their lethality.  
180 Proc Natl Acad Sci **111**:E2100-E2109.

181

182 9. **Marathe SA, Kumar R, Ajitkumar P, Nagaraja V, Chakravortty D.** 2013.  
183 Curcumin reduces the antimicrobial activity of ciprofloxacin against *Salmonella*  
184 *typhimurium* and *Salmonella typhi*. J Antimicrob Chemother **68**:139-152.

185

186 10. **Liu Y, Liu X, Qu Y, Wang X, Li L, Zhao X.** 2012. Inhibitors of reactive oxygen  
187 species accumulation delay and/or reduce the lethality of several antistaphylococcal  
188 agents. Antimicrob Agents Chemother **56**:6048-6050.

189

190 11. **Wang X, Zhao X, Malik M, Drlica K.** 2010. Contribution of reactive oxygen species  
191 to pathways of quinolone-mediated bacterial cell death. J Antimicrob Chemother  
192 **65**:520-524.

193

194 12. **Wang X, Zhao X.** 2009. Contribution of oxidative damage to antimicrobial lethality.  
195 Antimicrob Agents Chemother **53**:1395-1402.

196

197 13. **Tan X-E, Neoh H-m, Looi M-L, Tan TL, Hussin S, Cui L, Hiramatsu K, Jamal**  
198 **R.** 2016. Comparative proteomics profiling reveals down-regulation of



- 199            *Staphylococcus aureus* virulence in achieving intermediate vancomycin resistance.  
200            Malays J Microbiol **12**:498-505.  
201
- 202    14.    **Romsang A, Atichartpongkul S, Trinachartvanit W, Vattanaviboon P,**  
203            **Mongkolsuk S.** 2013. Gene expression and physiological role of *Pseudomonas*  
204            *aeruginosa* methionine sulfoxide reductases during oxidative stress. J Bacteriol  
205            **195**:3299-3308.  
206
- 207    15.    **Zhao C, Hartke A, La Sorda M, Posteraro B, Laplace J-M, Auffray Y,**  
208            **Sanguinetti M.** 2010. Role of methionine sulfoxide reductases A and B of  
209            *Enterococcus faecalis* in oxidative stress and virulence. Infect Immun **78**:3889-3897.  
210
- 211    16.    **Lee WL, Gold B, Darby C, Brot N, Jiang X, de Carvalho LPS, Wellner D, St**  
212            **John G, Jacobs WR, Jr., Nathan C.** 2009. *Mycobacterium tuberculosis* expresses  
213            methionine sulphoxide reductases A and B that protect from killing by nitrite and  
214            hypochlorite. Mol Microbiol **71**:583-593.  
215
- 216    17.    **Atack JM, Kelly DJ.** 2008. Contribution of the stereospecific methionine sulphoxide  
217            reductases MsrA and MsrB to oxidative and nitrosative stress resistance in the food-  
218            borne pathogen *Campylobacter jejuni*. Microbiology **154**:2219-2230.  
219
- 220    18.    **Oien DB, Moskovitz J.** 2008. Substrates of the methionine sulfoxide reductase  
221            system and their physiological relevance, p 94-135. In Schatten GP (ed), Current  
222            topics in developmental biology, vol 80. Academic Press, London, UK.  
223

- 224 19. **Pang YY, Schwartz J, Bloomberg S, Boyd JM, Horswill AR, Nauseef WM.** 2014.  
225 Methionine sulfoxide reductases protect against oxidative stress in *Staphylococcus*  
226 *aureus* encountering exogenous oxidants and human neutrophils. *J Innate Immun*  
227 **6**:353-364.  
228
- 229 20. **Liu C-I, Liu GY, Song Y, Yin F, Hensler ME, Jeng W-Y, Nizet V, Wang AH-J,**  
230 **Oldfield E.** 2008. A cholesterol biosynthesis inhibitor blocks *Staphylococcus aureus*  
231 virulence. *Science* **319**:1391-1394.  
232
- 233 21. **Liu GY, Essex A, Buchanan JT, Datta V, Hoffman HM, Bastian JF, Fierer J,**  
234 **Nizet V.** 2005. *Staphylococcus aureus* golden pigment impairs neutrophil killing and  
235 promotes virulence through its antioxidant activity. *J Exp Med* **202**:209-215.  
236
- 237 22. **Singh VK, Vaish M, Johansson TR, Baum KR, Ring RP, Singh S, Shukla SK,**  
238 **Moskovitz J.** 2015. Significance of four methionine sulfoxide reductases in  
239 *Staphylococcus aureus*. *PLoS One* **10**:e0117594-e0117613.  
240
- 241 23. **Sifri CD, Begun J, Ausubel FM, Calderwood SB.** 2003. *Caenorhabditis elegans* as  
242 a model host for *Staphylococcus aureus* pathogenesis. *Infect Immun* **71**:2208-2217.  
243
- 244 24. **Pukkila-Worley R, Ausubel FM, Mylonakis E.** 2011. *Candida albicans* infection of  
245 *Caenorhabditis elegans* induces antifungal immune defenses. *PLoS Pathog*  
246 **7**:e1002074-e1002086.  
247

- 248 25. **Irazoqui JE, Troemel ER, Feinbaum RL, Luhachack LG, Cezairliyan BO,**  
249 **Ausubel FM.** 2010. Distinct pathogenesis and host responses during infection of *C.*  
250 *elegans* by *P. aeruginosa* and *S. aureus*. PLoS Pathog **6**:e1000982-e1001005.
- 251
- 252 26. **Bekeredjian-Ding I, Inamura S, Giese T, Moll H, Endres S, Sing A, Zähringer U,**  
253 **Hartmann G.** 2007. *Staphylococcus aureus* protein A triggers T cell-independent B  
254 cell proliferation by sensitizing B cells for TLR2 ligands. J Immunol **178**:2803-2812.
- 255
- 256 27. **Chávez V, Mohri-Shiomi A, Maadani A, Vega LA, Garsin DA.** 2007. Oxidative  
257 stress enzymes are required for DAF-16-mediated immunity due to generation of  
258 reactive oxygen species by *Caenorhabditis elegans*. Genetics **176**:1567-1577.
- 259
- 260 28. **Tan X-E, Neoh H-m, Looi M-L, Chin SF, Cui L, Hiramatsu K, Hussin S, Jamal**  
261 **R.** 2017. Activated ADI pathway: the initiator of intermediate vancomycin resistance  
262 in *Staphylococcus aureus*. Can J Microbiol **63**:260-264.

263

## 264 **Figure Legends**

265 Figure 1: Voronoi mapping of total proteins extracted from Mu50Ω (panel A), Mu50Ω-  
266 *vraSm* (panel B) and Mu50Ω-*vraSm-graRm* (panel C). Each cell in the voronoi treemap  
267 represents one protein. Colour intensity of each cell is proportional to its protein abundance  
268 while cell size is relative to protein chain length. Total proteins have been categorized into 5  
269 groups, with the majority of proteins found to be involved in cellular metabolism and genetic  
270 information processing.

271

272 Figure 2: Comparative proteomic profiling of Mu50Ω, Mu50Ω-*vraSm* and Mu50Ω-*vraSm*-  
273 *graRm* revealed differential protein expression profiles regulated by the *VraS*, *GraR* and  
274 *VraS*-*GraR* regulons (comparison of protein profiles between Mu50Ω-*vraSm* and Mu50Ω,  
275 Mu50Ω-*vraSm*-*graRm* and Mu50Ω-*vraSm*, and between Mu50Ω-*vraSm*-*graRm* and Mu50Ω,  
276 respectively) (13). Virulence-related proteins (*Spa*, *Rot*, *MgrA*, *SarA*), *MsrB* and *ArcB*  
277 (proteins in text boxes) are the proteins of interest selected for further investigation of their  
278 association with vancomycin resistance as they were found to be differentially expressed in  
279 VISAs compared to VSSA.

280

281 Figure 3: Cumene hydroperoxide oxidative stress test on Mu50Ω, Mu50Ω-*vraSm* and  
282 Mu50Ω-*vraSm*-*graRm*. Both VISA strains showed higher resistance to oxidative stress  
283 compared to VSSA.

284

285 Figure 4: Tert-butyl hydroperoxide oxidative stress test on Mu50Ω, Mu50Ω-*vraSm* and  
286 Mu50Ω-*vraSm*-*graRm*. Both VISA strains were more resistant to oxidative killing compared  
287 to VSSA.

288

289 Figure 5: Hydrogen peroxide oxidative stress test on Mu50Ω, Mu50Ω-*vraSm* and Mu50Ω-  
290 *vraSm*-*graRm*. Mu50Ω was more resistant to oxidative stress from hydrogen peroxide  
291 induction compared to VISA strains.

292

293 Figure 6: Kaplan-Meier survival plot for *C. elegans* fed with Mu50Ω, Mu50Ω-*vraSm* and  
294 Mu50Ω-*vraSm*-*graRm*. A significant decrease in survival of *C. elegans* infected with VISA  
295 strains Mu50Ω-*vraSm* ( $p < 0.05$ ) and Mu50Ω-*vraSm*-*graRm* ( $p < 0.05$ ) was observed  
296 compared to those infected with VSSA strain Mu50Ω. Pairwise comparison also

297 demonstrated a significant reduction in the survival of Mu50 $\Omega$ -*vraSm-graRm*-infected *C.*  
298 *elegans* compared with Mu50 $\Omega$ -*vraSm*-infected worms ( $p < 0.05$ ).

299

300 Figure 7: VraSR- and GraSR-mediated regulatory pathways associated with intermediate  
301 vancomycin resistance in *Staphylococcus aureus* of the Mu50 lineage: (1) contribution of  
302 arginine catabolism (arginine deiminase, ADI) pathway to cell wall thickening, (2) MsrB-  
303 associated oxidative stress resistance, and (3) fitness-compensatory response.

304

Figure 1: Voronoi mapping of total proteins extracted from Mu50Ω (panel A), Mu50Ω-*vraSm* (panel B) and Mu50Ω-*vraSm-graRm* (panel C). Each cell in the voronoi treemap represents one protein. Colour intensity of each cell is proportional to its protein abundance while cell size is relative to protein chain length. Total proteins have been categorized into 5 groups, with the majority of proteins found to be involved in cellular metabolism and genetic information processing.

A

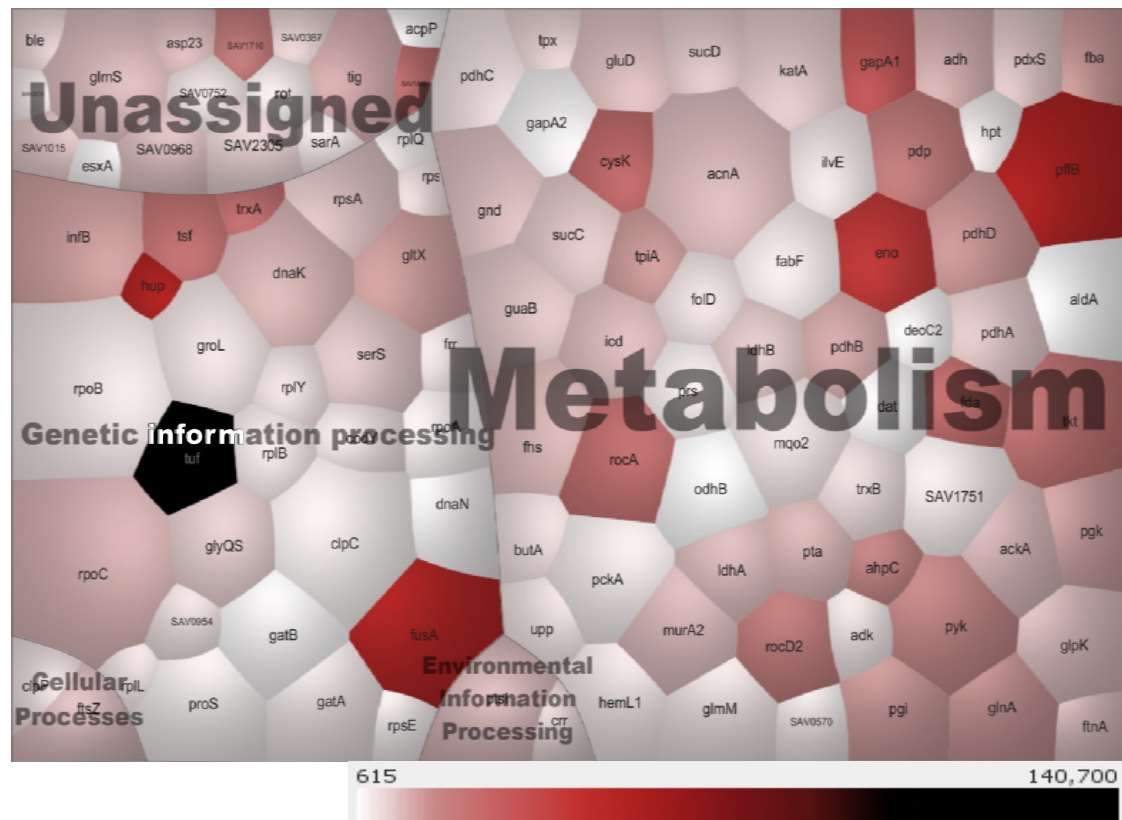



B

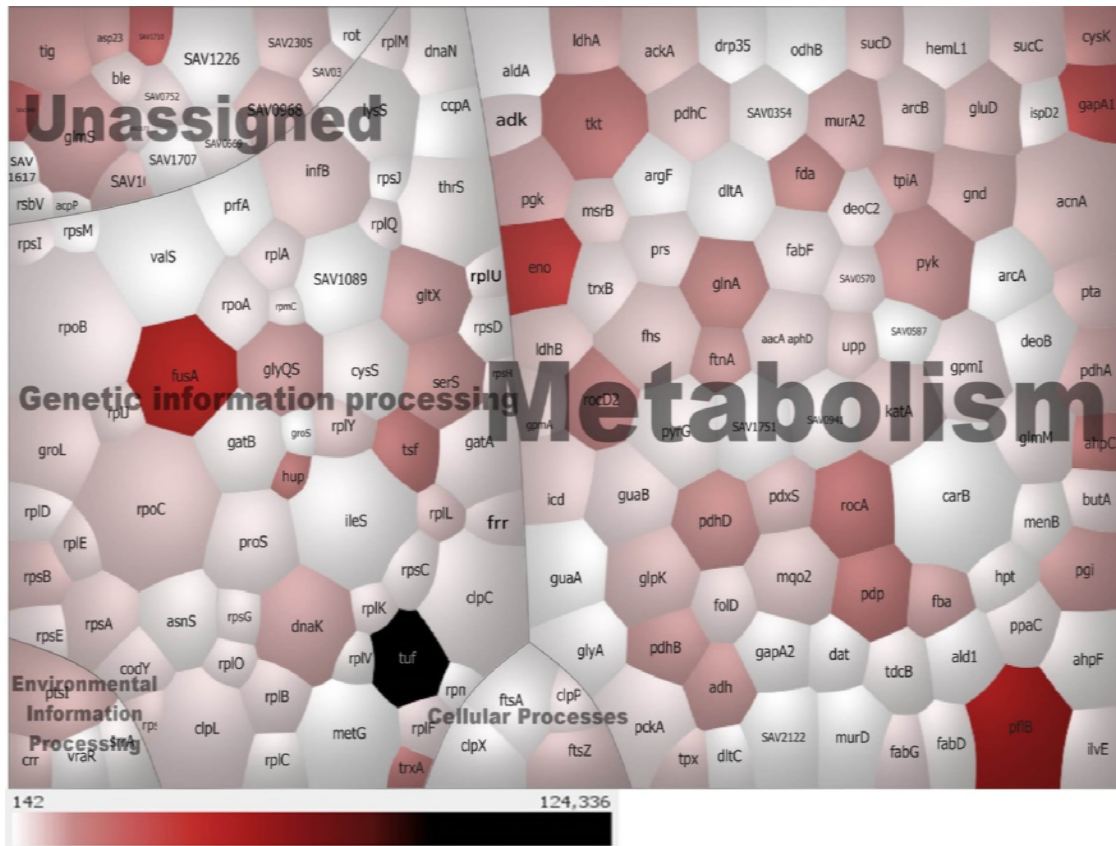

C

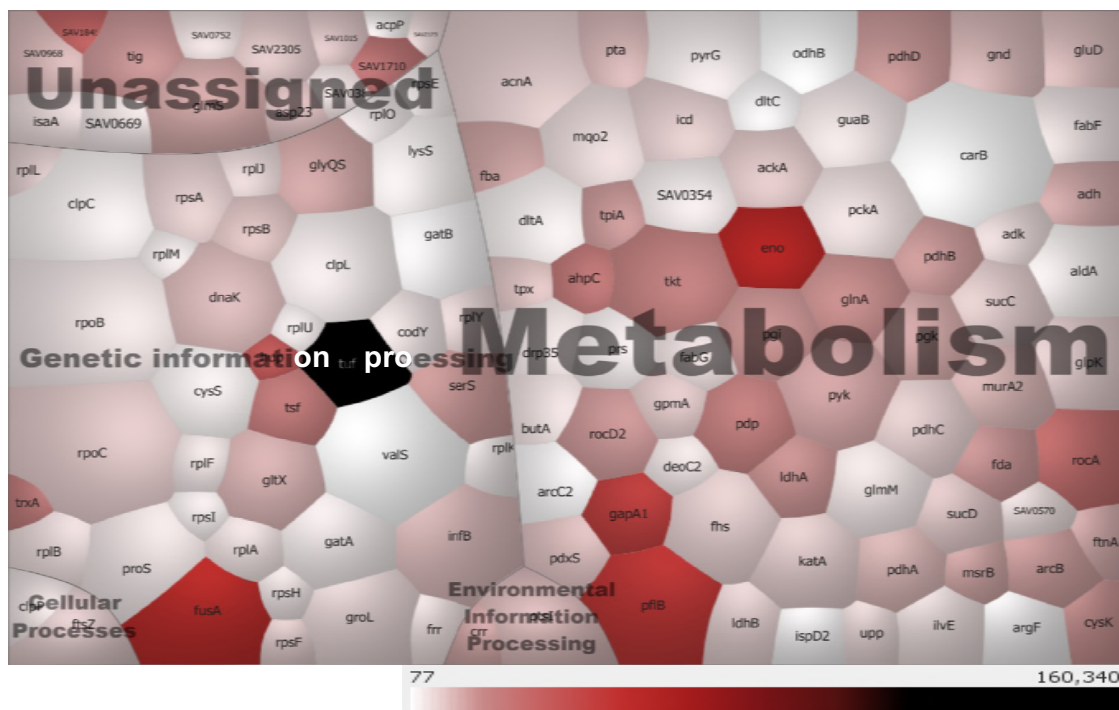

Figure 2: Comparative proteomic profiling of Mu50Ω, Mu50Ω-*vraSm* and Mu50Ω-*vraSm-graRm* revealed differential protein expression profiles regulated by the VraS, GraR and VraS-GraR regulons (comparison of protein profiles between Mu50Ω-*vraSm* and Mu50Ω, Mu50Ω-*vraSm-graRm* and Mu50Ω-*vraSm*, and between Mu50Ω-*vraSm-graRm* and Mu50Ω, respectively) (13). Virulence-related proteins (Spa, Rot, MgrA, SarA), MsrB and ArcB (proteins in text boxes) are the proteins of interest selected for further investigation of their association with vancomycin resistance as they were found to be differentially expressed in VISAs compared to VSSA.

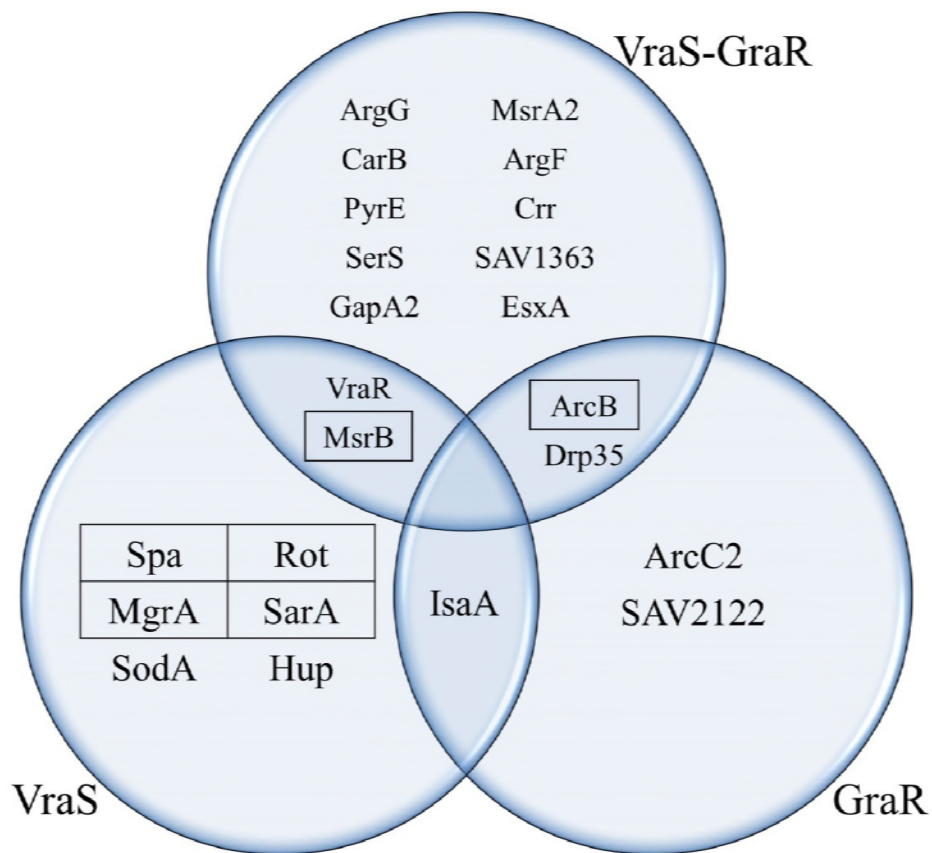



Figure 3: Cumene hydroperoxide oxidative stress test on Mu50Ω, Mu50Ω-*vraSm* and Mu50Ω-*vraSm-graRm*. Both VISA strains showed higher resistance to oxidative stress compared to VSSA.

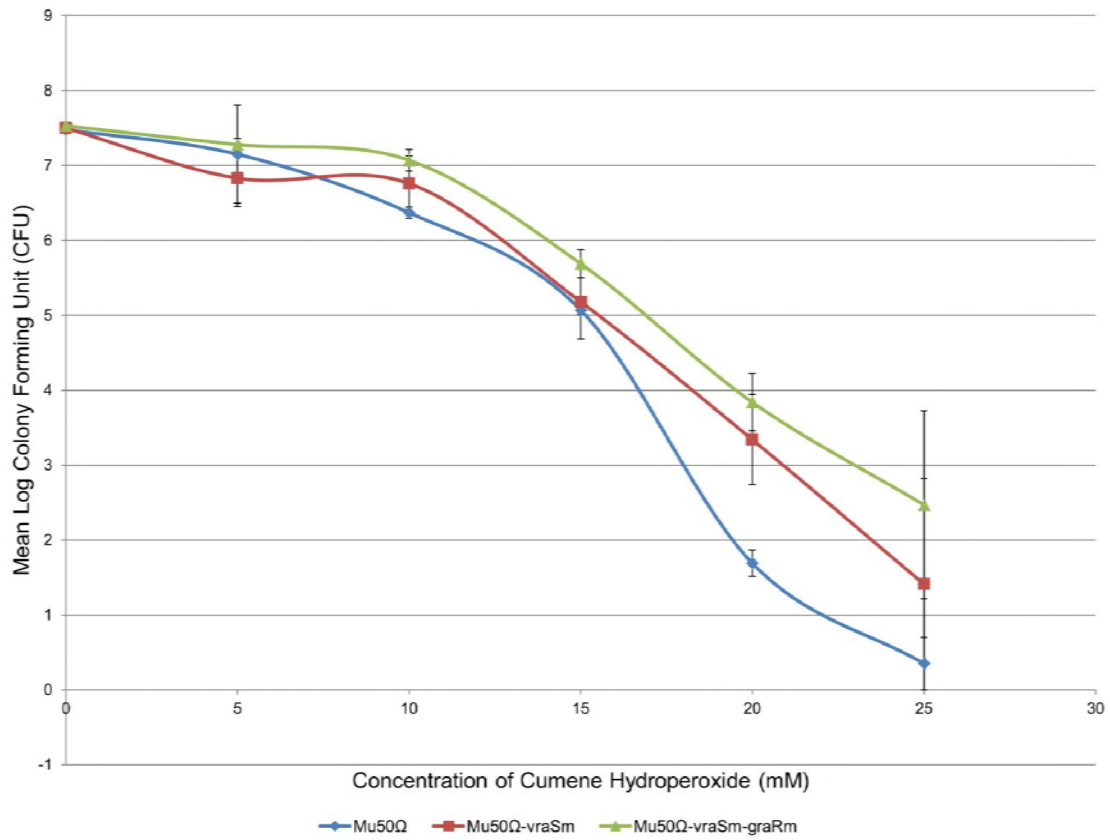

Figure 4: Tert-butyl hydroperoxide oxidative stress test on Mu50Ω, Mu50Ω-*vraSm* and Mu50Ω-*vraSm-graRm*. Both VISA strains were more resistant to oxidative killing compared to VSSA.

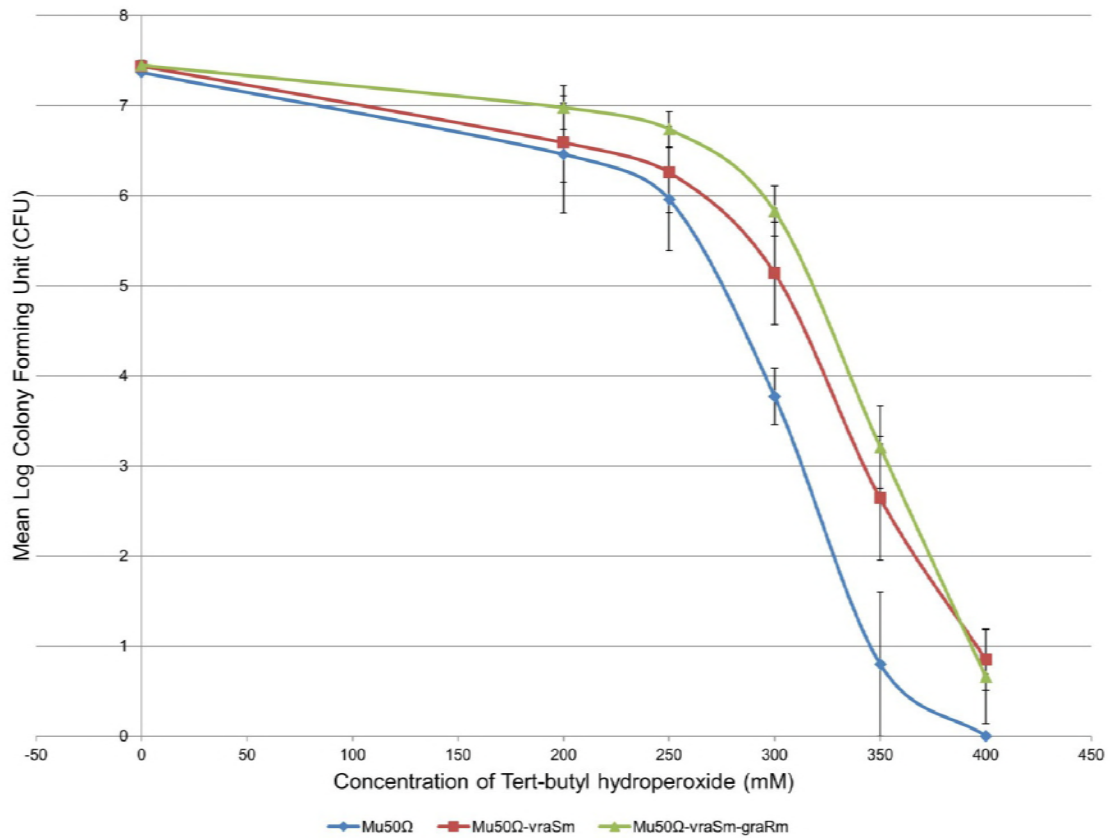

Figure 5: Hydrogen peroxide oxidative stress test on Mu50Ω, Mu50Ω-*vraSm* and Mu50Ω-*vraSm-graRm*. Mu50Ω was more resistant to oxidative stress from hydrogen peroxide induction compared to VISA strains.

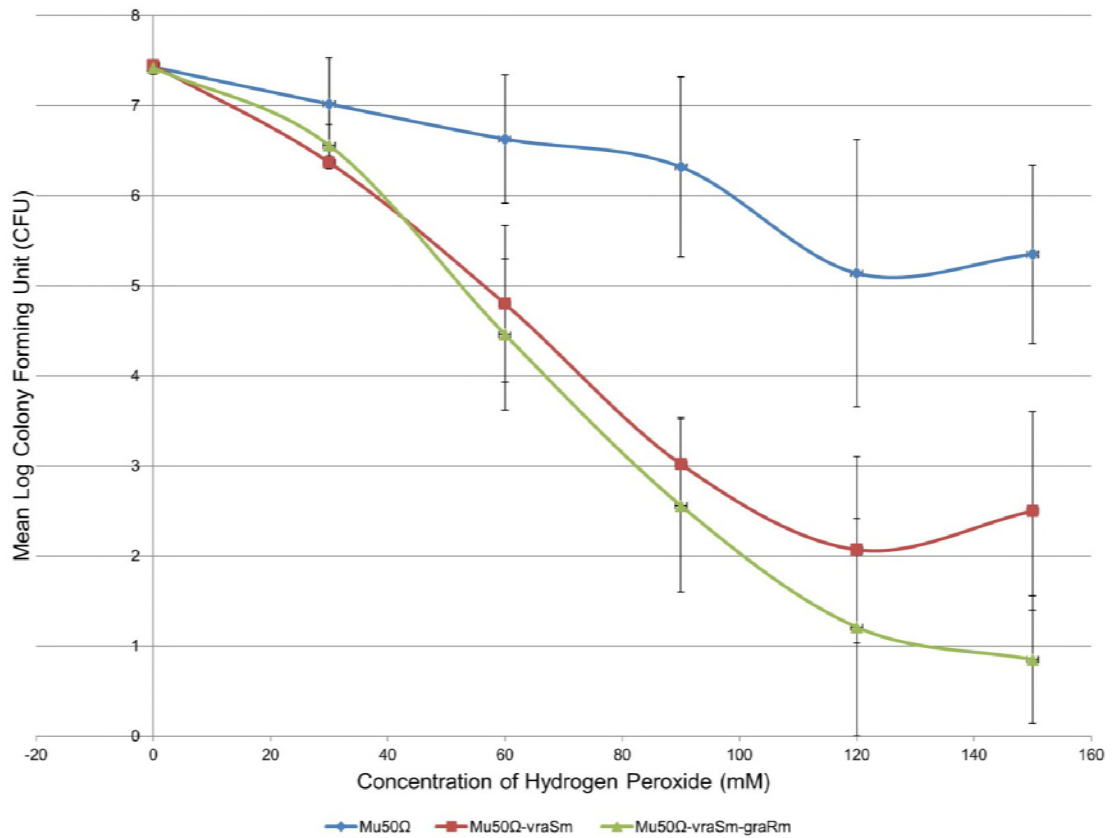

Figure 6: Kaplan-Meier survival plot for *C. elegans* fed with Mu50Ω, Mu50Ω-*vraSm* and Mu50Ω-*vraSm-graRm*. A significant decrease in survival of *C. elegans* infected with VISA strains Mu50Ω-*vraSm* ( $p < 0.05$ ) and Mu50Ω-*vraSm-graRm* ( $p < 0.05$ ) was observed compared to those infected with VSSA strain Mu50Ω. Pairwise comparison also demonstrated a significant reduction in the survival of Mu50Ω-*vraSm-graRm*-infected *C. elegans* compared with Mu50Ω-*vraSm*-infected worms ( $p < 0.05$ ).

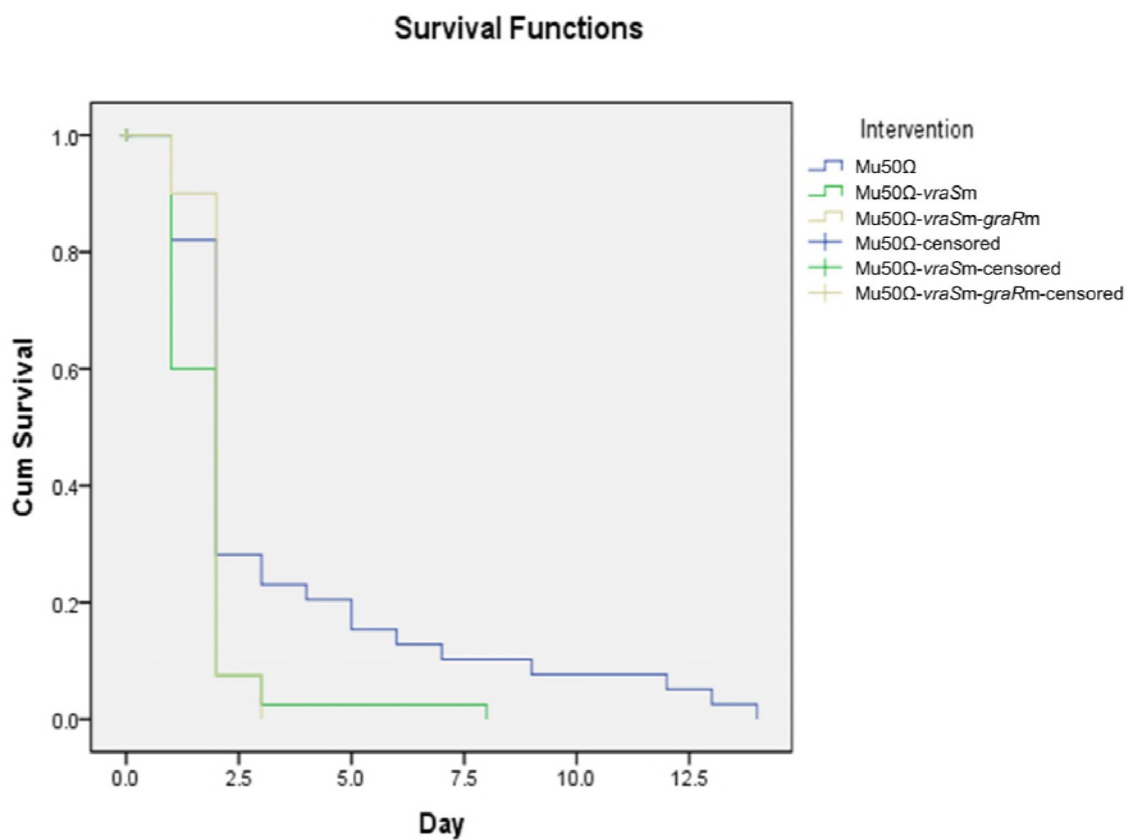

Figure 7: VraSR- and GraSR-mediated regulatory pathways associated with intermediate vancomycin resistance in *Staphylococcus aureus* of the Mu50 lineage: (1) contribution of arginine catabolism (arginine deiminase, ADI) pathway to cell wall thickening, (2) MsrB-associated oxidative stress resistance, and (3) fitness-compensatory response.

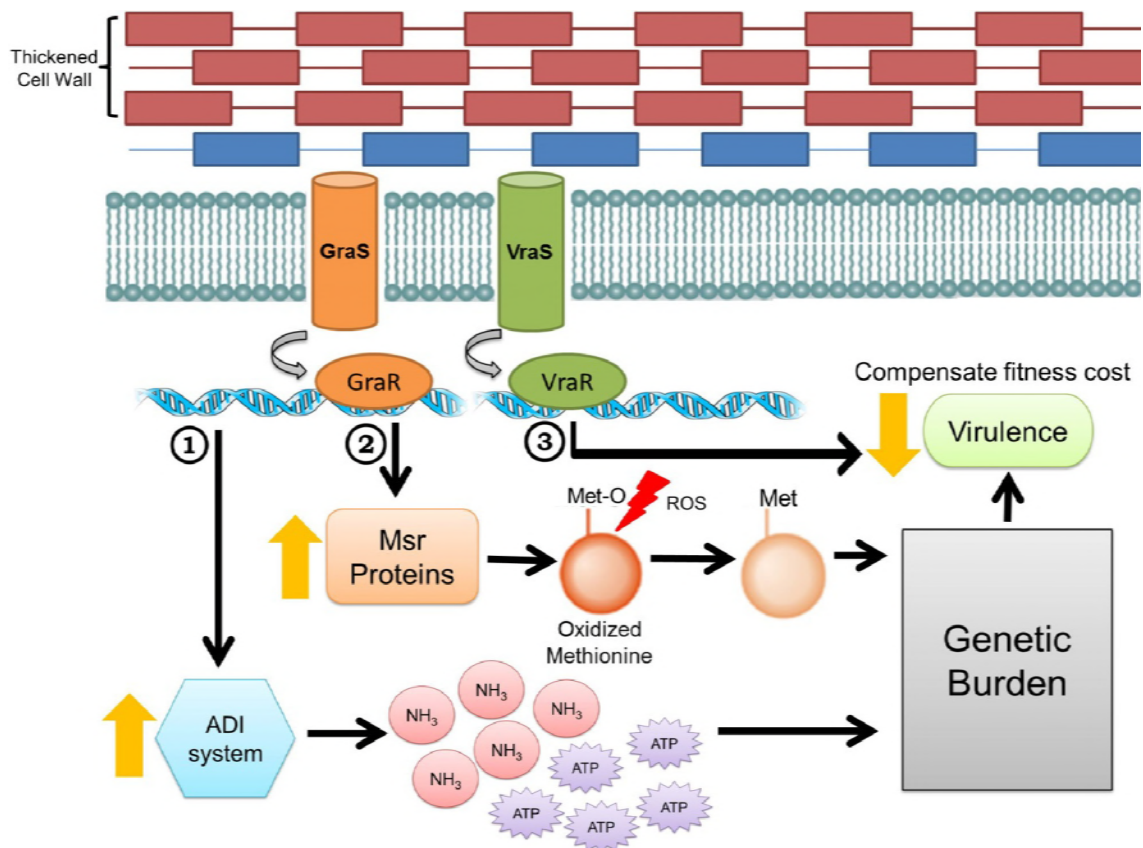

Source: https://www.biorxiv.org/content/10.1101/297036v1.full.pdf
